# Supplementary material
Source: PubMed Central journal article supplement (PMC2744611)
Supplement: jn.109.108225_1.pdf [file jn.109.108225_1.pdf]

## ONLINE SUPPORTING MATERIALS

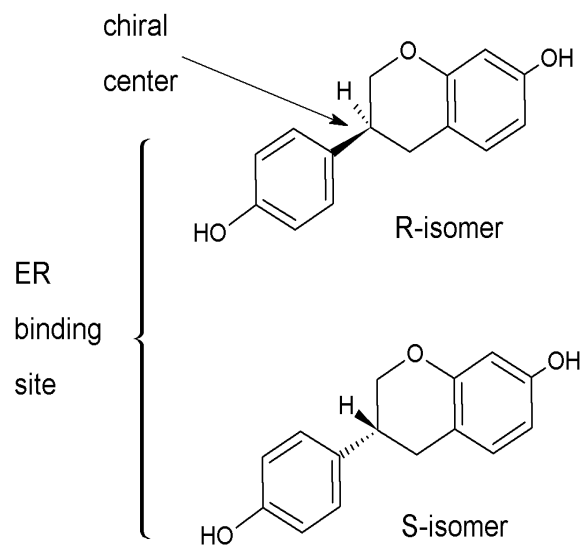

Supplemental Figure 1. Enantiomer forms of chemically synthesized equol. During equol synthesis, the chiral carbon atom at the position C-3 of the furan ring enables two enantiomeric forms, S-equol and R-equol. The binding affinity of S-equol (naturally occurring form) is greater for ER- $\beta$ , whereas binding affinity of the other isomer of equol, R-equol (chemically synthesized form) is greater for ER- $\alpha$ , which is abundant in reproductive tissues (6, 25).
